# Supplementary material for: Cognitive, Motor and Social Factors of Music Instrument Training Programs for Older Adults’ Improved Wellbeing
Source: PubMed Central journal article supplement (PMC6968490; doi:10.3389/fpsyg.2019.02868), 2020-01-10
Supplement: Data_Sheet_1.pdf [file Data_Sheet_1.pdf]

## 1 Supplementary Materials

### 1.1 Group distribution

|                      | Control<br>(n = 7) | C1<br>(n = 4) | C2<br>(n = 3) | Experimental<br>(n = 8) | E1<br>(n = 4) | E2<br>(n = 4) |
|----------------------|--------------------|---------------|---------------|-------------------------|---------------|---------------|
| No. of males:females | 1:6                | 1:3           | 0:3           | 2:6                     | 1:3           | 1:3           |
| Age (years)          | <b>69.0 (4.0)</b>  | 67.8 (3.7)    | 70.7 (3.8)    | <b>71.4 (5.3)</b>       | 73.0 (5.2)    | 69.8 (4.8)    |
| M-ACE                | <b>27.4 (1.7)</b>  | 27.5 (1.7)    | 27.3 (1.7)    | <b>29.3 (0.7)</b>       | 29.8 (0.4)    | 28.8 (0.4)    |
| DASH                 | <b>31.4 (4.4)</b>  | 30.0 (3.7)    | 33.3 (4.5)    | <b>29.6 (5.0)</b>       | 30.6 (3.9)    | 28.5 (5.7)    |

### 1.2 Interpreting effects in beta regression

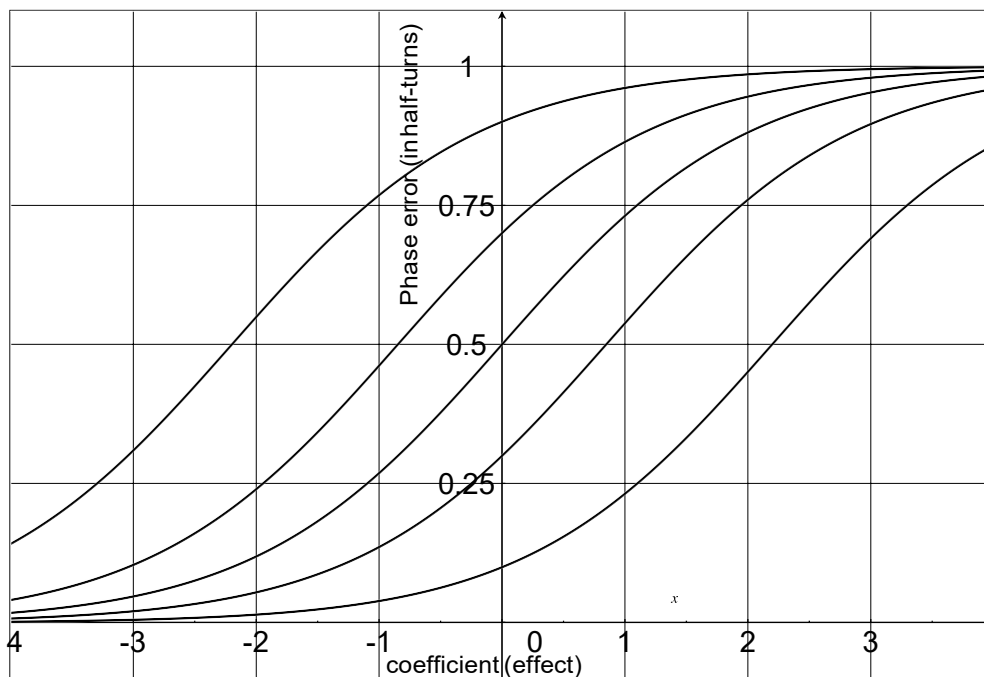

Figure 2. The vertical axis shows the phase error (expressed in half-turn units so it is in the unit interval) after a unit increase in a predictor whose coefficient (effect) is shown in the horizontal axis. The amount of change varies as a function of the coefficient and of the original phase error. The five lines, from bottom-to-top, have original phase errors of 0.1, 0.3, 0.5, 0.7, and 0.9, respectively. Note

that a coefficient of 0 means the predictor has no effect on the phase error; a coefficient larger than 0 increases phase error; a coefficient less than 0 decreases phase error.

### 1.3 Model priors

#### 1.3.1 Linear models

|    | prior               | class                  | coef          |
|----|---------------------|------------------------|---------------|
| 1  | student_t(3,0,1)    | b                      |               |
| 2  |                     | b                      | age           |
| 3  |                     | b                      | classC2       |
| 4  |                     | b                      | classE1       |
| 5  |                     | b                      | classE2       |
| 6  |                     | b                      | DASH          |
| 7  |                     | b                      | is_trained1   |
| 8  |                     | b is_trained1: classC2 |               |
| 9  |                     | b is_trained1: classE1 |               |
| 10 |                     | b is_trained1: classE2 |               |
| 11 |                     | b                      | JTHFT_dom_pre |
| 12 |                     | b                      | n_pretests1   |
| 13 | student_t(3, 0, 10) | Intercept              |               |
| 14 | student_t(3, 0, 10) | sigma                  |               |

#### 1.3.2 Beta models (for Polhemus)

|    | prior               | class                  | coef             |
|----|---------------------|------------------------|------------------|
| 1  | student_t(3,0,1)    | b                      |                  |
| 2  |                     | b                      | age              |
| 3  |                     | b                      | classC2          |
| 4  |                     | b                      | classE1          |
| 5  |                     | b                      | classE2          |
| 6  |                     | b                      | DASH             |
| 7  |                     | b                      | is_trained1      |
| 8  |                     | b is_trained1: classC2 |                  |
| 9  |                     | b is_trained1: classE1 |                  |
| 10 |                     | b is_trained1: classE2 |                  |
| 11 |                     | b                      | n_pretests1      |
| 12 |                     | b                      | Polhemus_del_pre |
| 13 | student_t(3, 0, 10) | Intercept              |                  |
| 14 | gamma(0.01, 0.01)   | phi                    |                  |

### 1.4 Model summaries

#### 1.4.1 JTHFT\_dom model without class interaction

Family: gaussian

Links: mu = identity; sigma = identity

Formula: JTHFT\_dom\_post ~ JTHFT\_dom\_pre + n\_pretests + is\_trained + age + DASH

Data: fingers\_tap\_data (Number of observations: 21)

Samples: 4 chains, each with iter = 10000; warmup = 5000; thin = 1;

total post-warmup samples = 20000

Population-Level Effects:

|               | Estimate | Est.Error | l-95% CI | u-95% CI | Rhat | Bulk_ESS | Tail_ESS |
|---------------|----------|-----------|----------|----------|------|----------|----------|
| Intercept     | -0.06    | 0.23      | -0.53    | 0.40     | 1.00 | 17600    | 13567    |
| JTHFT_dom_pre | 0.78     | 0.15      | 0.48     | 1.07     | 1.00 | 14053    | 13274    |
| n_pretests1   | 0.44     | 0.34      | -0.24    | 1.11     | 1.00 | 14209    | 12546    |
| is_trained1   | -0.13    | 0.34      | -0.80    | 0.54     | 1.00 | 12800    | 13721    |
| age           | -0.07    | 0.16      | -0.37    | 0.25     | 1.00 | 13289    | 11740    |
| DASH          | -0.15    | 0.16      | -0.46    | 0.18     | 1.00 | 13045    | 12966    |

Family Specific Parameters:

|       | Estimate | Est.Error | l-95% CI | u-95% CI | Rhat | Bulk_ESS | Tail_ESS |
|-------|----------|-----------|----------|----------|------|----------|----------|
| sigma | 0.63     | 0.13      | 0.44     | 0.93     | 1.00 | 11036    | 12743    |

|    | Estimate  | Est.Error  | Q2.5      | Q97.5     |
|----|-----------|------------|-----------|-----------|
| R2 | 0.6836007 | 0.08003933 | 0.4752476 | 0.7797765 |

Hypothesis Estimate Est.Error CI.Lower CI.Upper Evid.Ratio Post.Prob

|                     |       |      |       |      |      |      |
|---------------------|-------|------|-------|------|------|------|
| 1 (is_trained1) < 0 | -0.13 | 0.34 | -0.68 | 0.43 | 1.86 | 0.65 |
| 2 (age) > 0         | -0.07 | 0.16 | -0.32 | 0.19 | 0.49 | 0.33 |
| 3 (DASH) < 0        | -0.15 | 0.16 | -0.40 | 0.12 | 4.71 | 0.82 |
| 4 (n_pretests1) > 0 | 0.44  | 0.34 | -0.13 | 1.00 | 9.00 | 0.90 |

### 1.4.2 JTHFT\_dom model with class interaction

Family: gaussian  
 Links: mu = identity; sigma = identity  
 Formula: JTHFT\_dom\_post ~ JTHFT\_dom\_pre + is\_trained \* class + age + DASH  
 Data: fingers\_tap\_data (Number of observations: 21)  
 Samples: 4 chains, each with iter = 10000; warmup = 5000; thin = 1;  
 total post-warmup samples = 20000

Population-Level Effects:

|                     | Estimate | Est.Error | l-95% CI | u-95% CI | Rhat | Bulk_ESS | Tail_ESS |
|---------------------|----------|-----------|----------|----------|------|----------|----------|
| Intercept           | -0.11    | 0.32      | -0.72    | 0.54     | 1.00 | 16358    | 15149    |
| JTHFT_dom_pre       | 0.82     | 0.17      | 0.47     | 1.15     | 1.00 | 17713    | 12409    |
| is_trained1         | 0.41     | 0.44      | -0.47    | 1.28     | 1.00 | 13115    | 13081    |
| classC2             | 0.14     | 0.40      | -0.65    | 0.93     | 1.00 | 15565    | 13790    |
| classE1             | -0.38    | 0.86      | -2.12    | 1.31     | 1.00 | 13748    | 10655    |
| classE2             | -0.15    | 0.84      | -1.83    | 1.49     | 1.00 | 13209    | 11673    |
| age                 | -0.05    | 0.17      | -0.38    | 0.28     | 1.00 | 16425    | 13744    |
| DASH                | -0.15    | 0.17      | -0.48    | 0.20     | 1.00 | 15772    | 13963    |
| is_trained1:classC2 | -0.29    | 0.56      | -1.41    | 0.79     | 1.00 | 12833    | 13368    |
| is_trained1:classE1 | -0.36    | 0.86      | -2.11    | 1.33     | 1.00 | 13828    | 10589    |
| is_trained1:classE2 | -0.14    | 0.85      | -1.83    | 1.54     | 1.00 | 13069    | 11113    |

Family Specific Parameters:

|       | Estimate | Est.Error | l-95% CI | u-95% CI | Rhat | Bulk_ESS | Tail_ESS |
|-------|----------|-----------|----------|----------|------|----------|----------|
| sigma | 0.65     | 0.14      | 0.44     | 1.00     | 1.00 | 9862     | 10207    |

  

|    | Estimate  | Est.Error  | Q2.5      | Q97.5     |
|----|-----------|------------|-----------|-----------|
| R2 | 0.6876289 | 0.08194121 | 0.4777197 | 0.7909059 |

Hypothesis Tests for class b:

|   | Hypothesis                            | Estimate | Est.Error | CI.Lower | CI.Upper | Evid.Ratio | Post.Prob |
|---|---------------------------------------|----------|-----------|----------|----------|------------|-----------|
| 1 | (is_trained1) < 0                     | 0.41     | 0.44      | -0.32    | 1.13     | 0.20       | 0.17      |
| 2 | (is_trained1+is_trained1:classC2) < 0 | 0.12     | 0.46      | -0.63    | 0.86     | 0.64       | 0.39      |
| 3 | (is_trained1+is_trained1:classE1) < 0 | 0.06     | 0.91      | -1.42    | 1.52     | 0.90       | 0.47      |
| 4 | (is_trained1+is_trained1:classE2) < 0 | 0.27     | 0.90      | -1.20    | 1.73     | 0.59       | 0.37      |
| 5 | (is_trained1:classC2) < 0             | -0.29    | 0.56      | -1.21    | 0.62     | 2.42       | 0.71      |

### 1.4.3 JTHFT\_non\_dom model without class interaction

Family: gaussian  
 Links: mu = identity; sigma = identity  
 Formula: JTHFT\_non\_dom\_post ~ JTHFT\_non\_dom\_pre + n\_pretests + is\_trained + age + DASH  
 Data: fingers\_tap\_data (Number of observations: 21)  
 Samples: 4 chains, each with iter = 10000; warmup = 5000; thin = 1;  
 total post-warmup samples = 20000

Population-Level Effects:

|                   | Estimate | Est.Error | l-95% CI | u-95% CI | Rhat | Bulk_ESS | Tail_ESS |
|-------------------|----------|-----------|----------|----------|------|----------|----------|
| Intercept         | 0.01     | 0.33      | -0.64    | 0.67     | 1.00 | 20766    | 15374    |
| JTHFT_non_dom_pre | 0.38     | 0.24      | -0.09    | 0.85     | 1.00 | 14589    | 14102    |
| n_pretests1       | 0.51     | 0.47      | -0.42    | 1.44     | 1.00 | 17911    | 14947    |
| is_trained1       | -0.25    | 0.48      | -1.22    | 0.70     | 1.00 | 14364    | 14857    |
| age               | -0.31    | 0.21      | -0.73    | 0.12     | 1.00 | 19584    | 13367    |
| DASH              | -0.04    | 0.24      | -0.51    | 0.43     | 1.00 | 17464    | 14595    |

Family Specific Parameters:

|       | Estimate | Est.Error | l-95% CI | u-95% CI | Rhat | Bulk_ESS | Tail_ESS |
|-------|----------|-----------|----------|----------|------|----------|----------|
| sigma | 0.90     | 0.18      | 0.63     | 1.33     | 1.00 | 15360    | 14027    |

  

|    | Estimate  | Est.Error | Q2.5      | Q97.5     |
|----|-----------|-----------|-----------|-----------|
| R2 | 0.4311617 | 0.1124369 | 0.1699757 | 0.6011411 |

Hypothesis Tests for class b:

|   | Hypothesis        | Estimate | Est.Error | CI.Lower | CI.Upper | Evid.Ratio | Post.Prob |
|---|-------------------|----------|-----------|----------|----------|------------|-----------|
| 1 | (is_trained1) < 0 | -0.25    | 0.48      | -1.04    | 0.53     | 2.34       | 0.70      |
| 2 | (age) > 0         | -0.31    | 0.21      | -0.65    | 0.05     | 0.08       | 0.07      |

3 (DASH) < 0 -0.04 0.24 -0.43 0.34 1.40 0.58  
 4 (n\_pretests1) > 0 0.51 0.47 -0.26 1.28 6.55 0.87

### 1.4.4 JTHFT\_non\_dom model with class interaction

Family: gaussian

Links: mu = identity; sigma = identity

Formula: JTHFT\_non\_dom\_post ~ JTHFT\_non\_dom\_pre + is\_trained \* class + age + DASH

Data: fingers\_tap\_data (Number of observations: 21)

Samples: 4 chains, each with iter = 10000; warmup = 5000; thin = 1;  
 total post-warmup samples = 20000

Population-Level Effects:

|                     | Estimate | Est.Error | l-95% CI | u-95% CI | Rhat | Bulk_ESS | Tail_ESS |
|---------------------|----------|-----------|----------|----------|------|----------|----------|
| Intercept           | -0.03    | 0.41      | -0.86    | 0.78     | 1.00 | 18738    | 14864    |
| JTHFT_non_dom_pre   | 0.30     | 0.26      | -0.22    | 0.83     | 1.00 | 15816    | 13866    |
| is_trained1         | -0.01    | 0.54      | -1.07    | 1.08     | 1.00 | 13736    | 12764    |
| classC2             | 0.22     | 0.51      | -0.77    | 1.25     | 1.00 | 16121    | 13745    |
| classE1             | -0.15    | 0.89      | -1.94    | 1.59     | 1.00 | 12415    | 10414    |
| classE2             | -0.15    | 0.86      | -1.89    | 1.52     | 1.00 | 12659    | 10683    |
| age                 | -0.32    | 0.23      | -0.77    | 0.14     | 1.00 | 16256    | 13642    |
| DASH                | 0.02     | 0.25      | -0.48    | 0.51     | 1.00 | 15146    | 13806    |
| is_trained1:classC2 | 0.45     | 0.68      | -0.87    | 1.85     | 1.00 | 14195    | 13413    |
| is_trained1:classE1 | -0.16    | 0.88      | -1.92    | 1.59     | 1.00 | 12221    | 10212    |
| is_trained1:classE2 | -0.15    | 0.86      | -1.89    | 1.57     | 1.00 | 12420    | 11123    |

Family Specific Parameters:

|       | Estimate | Est.Error | l-95% CI | u-95% CI | Rhat | Bulk_ESS | Tail_ESS |
|-------|----------|-----------|----------|----------|------|----------|----------|
| sigma | 0.93     | 0.20      | 0.64     | 1.40     | 1.00 | 11143    | 12043    |

|    | Estimate  | Est.Error  | Q2.5      | Q97.5    |
|----|-----------|------------|-----------|----------|
| R2 | 0.4758789 | 0.09977843 | 0.2459026 | 0.623936 |

Hypothesis Tests for class b:

| Star | Hypothesis                            | Estimate | Est.Error | CI.Lower | CI.Upper | Evid.Ratio | Post.Prob |
|------|---------------------------------------|----------|-----------|----------|----------|------------|-----------|
| 1    | (is_trained1) < 0                     | -0.01    | 0.54      | -0.88    | 0.88     | 1.02       | 0.51      |
| 2    | (is_trained1+is_trained1:classC2) < 0 | 0.45     | 0.63      | -0.58    | 1.47     | 0.30       | 0.23      |
| 3    | (is_trained1+is_trained1:classE1) < 0 | -0.16    | 0.97      | -1.73    | 1.40     | 1.34       | 0.57      |
| 4    | (is_trained1+is_trained1:classE2) < 0 | -0.15    | 0.96      | -1.70    | 1.42     | 1.33       | 0.57      |
| 5    | (is_trained1:classC2) < 0             | 0.45     | 0.68      | -0.63    | 1.59     | 0.33       | 0.25      |

### 1.4.5 TMTA model without class interaction

Family: gaussian

Links: mu = identity; sigma = identity

Formula: TMTA\_post ~ TMTA\_pre + n\_pretests + is\_trained + age + DASH

Data: fingers\_tap\_data (Number of observations: 21)

Samples: 4 chains, each with iter = 10000; warmup = 5000; thin = 1;  
 total post-warmup samples = 20000

Population-Level Effects:

|             | Estimate | Est.Error | l-95% CI | u-95% CI | Rhat | Bulk_ESS | Tail_ESS |
|-------------|----------|-----------|----------|----------|------|----------|----------|
| Intercept   | 0.18     | 0.33      | -0.48    | 0.83     | 1.00 | 19466    | 14272    |
| TMTA_pre    | 0.44     | 0.23      | -0.01    | 0.89     | 1.00 | 16765    | 13192    |
| n_pretests1 | -0.04    | 0.47      | -0.97    | 0.90     | 1.00 | 16356    | 13484    |
| is_trained1 | -0.30    | 0.45      | -1.18    | 0.59     | 1.00 | 16362    | 13324    |
| age         | 0.02     | 0.24      | -0.46    | 0.49     | 1.00 | 14906    | 13085    |
| DASH        | 0.24     | 0.24      | -0.23    | 0.72     | 1.00 | 15226    | 13490    |

Family Specific Parameters:

|       | Estimate | Est.Error | l-95% CI | u-95% CI | Rhat | Bulk_ESS | Tail_ESS |
|-------|----------|-----------|----------|----------|------|----------|----------|
| sigma | 0.97     | 0.19      | 0.68     | 1.42     | 1.00 | 12271    | 12483    |

|    | Estimate  | Est.Error | Q2.5      | Q97.5    |
|----|-----------|-----------|-----------|----------|
| R2 | 0.3801217 | 0.1117103 | 0.1345271 | 0.558303 |

|   | Hypothesis        | Estimate | Est.Error | CI.Lower | CI.Upper | Evid.Ratio | Post.Prob |
|---|-------------------|----------|-----------|----------|----------|------------|-----------|
| 1 | (is_trained1) < 0 | -0.30    | 0.45      | -1.02    | 0.44     | 3.03       | 0.75      |
| 2 | (age) > 0         | 0.02     | 0.24      | -0.38    | 0.40     | 1.16       | 0.54      |
| 3 | (DASH) < 0        | 0.24     | 0.24      | -0.15    | 0.63     | 0.17       | 0.15      |
| 4 | (n_pretests1) > 0 | -0.04    | 0.47      | -0.81    | 0.74     | 0.88       | 0.47      |

### 1.4.6 TMTA model with class interaction

Family: gaussian  
 Links: mu = identity; sigma = identity  
 Formula: TMTA\_post ~ TMTA\_pre + is\_trained \* class + age + DASH  
 Data: fingers\_tap\_data (Number of observations: 21)  
 Samples: 4 chains, each with iter = 10000; warmup = 5000; thin = 1;  
 total post-warmup samples = 20000

Population-Level Effects:

|                     | Estimate | Est.Error | l-95% CI | u-95% CI | Rhat | Bulk_ESS | Tail_ESS |
|---------------------|----------|-----------|----------|----------|------|----------|----------|
| Intercept           | -0.00    | 0.40      | -0.80    | 0.81     | 1.00 | 15087    | 15356    |
| TMTA_pre            | 0.50     | 0.24      | 0.02     | 0.95     | 1.00 | 15658    | 12700    |
| is_trained1         | 0.21     | 0.56      | -0.89    | 1.30     | 1.00 | 10911    | 12681    |
| classC2             | 0.46     | 0.53      | -0.60    | 1.51     | 1.00 | 12878    | 13834    |
| classE1             | -0.19    | 0.88      | -1.97    | 1.55     | 1.00 | 14281    | 11679    |
| classE2             | -0.15    | 0.86      | -1.90    | 1.54     | 1.00 | 13838    | 11377    |
| age                 | 0.02     | 0.24      | -0.46    | 0.49     | 1.00 | 15779    | 13868    |
| DASH                | 0.16     | 0.22      | -0.28    | 0.61     | 1.00 | 15770    | 13812    |
| is_trained1:classC2 | -1.21    | 0.80      | -2.81    | 0.29     | 1.00 | 9798     | 12089    |
| is_trained1:classE1 | -0.20    | 0.88      | -1.98    | 1.50     | 1.00 | 14464    | 12126    |
| is_trained1:classE2 | -0.16    | 0.86      | -1.92    | 1.53     | 1.00 | 14158    | 11543    |

Family Specific Parameters:

|       | Estimate | Est.Error | l-95% CI | u-95% CI | Rhat | Bulk_ESS | Tail_ESS |
|-------|----------|-----------|----------|----------|------|----------|----------|
| sigma | 0.90     | 0.20      | 0.60     | 1.37     | 1.00 | 9775     | 10726    |

|    | Estimate  | Est.Error | Q2.5      | Q97.5     |
|----|-----------|-----------|-----------|-----------|
| R2 | 0.4788965 | 0.1077302 | 0.2351561 | 0.6461209 |

Hypothesis Tests for class b:

|   | Hypothesis                            | Estimate | Est.Error | CI.Lower | CI.Upper | Evid.Ratio | Post.Prob |
|---|---------------------------------------|----------|-----------|----------|----------|------------|-----------|
| 1 | (is_trained1) < 0                     | 0.21     | 0.56      | -0.71    | 1.12     | 0.53       | 0.35      |
| 2 | (is_trained1+is_trained1:classC2) < 0 | -1.00    | 0.64      | -2.04    | 0.06     | 16.15      | 0.94      |
| 3 | (is_trained1+is_trained1:classE1) < 0 | 0.02     | 0.96      | -1.55    | 1.55     | 0.96       | 0.49      |
| 4 | (is_trained1+is_trained1:classE2) < 0 | 0.06     | 0.95      | -1.49    | 1.60     | 0.90       | 0.47      |
| 5 | (is_trained1:classC2) < 0             | -1.21    | 0.80      | -2.54    | 0.06     | 15.91      | 0.94      |

### 1.4.7 TMTB model without class interaction

Family: gaussian  
 Links: mu = identity; sigma = identity  
 Formula: TMTB\_post ~ TMTB\_pre + n\_pretests + is\_trained + age + DASH  
 Data: fingers\_tap\_data (Number of observations: 19)  
 Samples: 4 chains, each with iter = 10000; warmup = 5000; thin = 1;  
 total post-warmup samples = 20000

Population-Level Effects:

|             | Estimate | Est.Error | l-95% CI | u-95% CI | Rhat | Bulk_ESS | Tail_ESS |
|-------------|----------|-----------|----------|----------|------|----------|----------|
| Intercept   | -0.33    | 0.37      | -1.07    | 0.41     | 1.00 | 16560    | 13523    |
| TMTB_pre    | 0.42     | 0.24      | -0.05    | 0.89     | 1.00 | 15543    | 12732    |
| n_pretests1 | -0.07    | 0.50      | -1.05    | 0.94     | 1.00 | 16009    | 13465    |
| is_trained1 | 0.48     | 0.48      | -0.49    | 1.42     | 1.00 | 14780    | 12296    |
| age         | 0.07     | 0.24      | -0.41    | 0.55     | 1.00 | 13929    | 12831    |
| DASH        | 0.37     | 0.25      | -0.13    | 0.86     | 1.00 | 14011    | 12553    |

Family Specific Parameters:

|       | Estimate | Est.Error | l-95% CI | u-95% CI | Rhat | Bulk_ESS | Tail_ESS |
|-------|----------|-----------|----------|----------|------|----------|----------|
| sigma | 1.00     | 0.21      | 0.68     | 1.51     | 1.00 | 10487    | 12588    |

|    | Estimate | Est.Error | Q2.5      | Q97.5     |
|----|----------|-----------|-----------|-----------|
| R2 | 0.375349 | 0.1147521 | 0.1262941 | 0.5594042 |

Hypothesis Tests for class b:

|   | Hypothesis        | Estimate | Est.Error | CI.Lower | CI.Upper | Evid.Ratio | Post.Prob |
|---|-------------------|----------|-----------|----------|----------|------------|-----------|
| 1 | (is_trained1) < 0 | 0.48     | 0.48      | -0.31    | 1.26     | 0.17       | 0.15      |
| 2 | (age) > 0         | 0.07     | 0.24      | -0.33    | 0.46     | 1.62       | 0.62      |
| 3 | (DASH) < 0        | 0.37     | 0.25      | -0.03    | 0.77     | 0.07       | 0.06      |
| 4 | (n_pretests1) > 0 | -0.07    | 0.50      | -0.89    | 0.77     | 0.79       | 0.44      |

## 1.4.8 TMTB model with class interaction

Family: gaussian  
 Links: mu = identity; sigma = identity  
 Formula: TMTB\_post ~ TMTB\_pre + is\_trained \* class + age + DASH  
 Data: fingers\_tap\_data (Number of observations: 19)  
 Samples: 4 chains, each with iter = 10000; warmup = 5000; thin = 1;  
 total post-warmup samples = 20000

### Population-Level Effects:

|                     | Estimate | Est.Error | l-95% CI | u-95% CI | Rhat | Bulk_ESS | Tail_ESS |
|---------------------|----------|-----------|----------|----------|------|----------|----------|
| Intercept           | -0.37    | 0.46      | -1.29    | 0.55     | 1.00 | 18370    | 14807    |
| TMTB_pre            | 0.42     | 0.26      | -0.10    | 0.92     | 1.00 | 18503    | 13295    |
| is_trained1         | 0.33     | 0.60      | -0.82    | 1.55     | 1.00 | 16110    | 14301    |
| classC2             | 0.07     | 0.58      | -1.11    | 1.22     | 1.00 | 17408    | 14319    |
| classE1             | 0.10     | 0.88      | -1.67    | 1.86     | 1.00 | 15146    | 11840    |
| classE2             | 0.15     | 0.88      | -1.59    | 1.98     | 1.00 | 16090    | 11936    |
| age                 | 0.06     | 0.26      | -0.46    | 0.59     | 1.00 | 15858    | 13163    |
| DASH                | 0.39     | 0.28      | -0.16    | 0.94     | 1.00 | 16984    | 14336    |
| is_trained1:classC2 | 0.12     | 0.76      | -1.39    | 1.65     | 1.00 | 17021    | 14351    |
| is_trained1:classE1 | 0.07     | 0.88      | -1.67    | 1.88     | 1.00 | 15479    | 11740    |
| is_trained1:classE2 | 0.15     | 0.89      | -1.61    | 1.93     | 1.00 | 15883    | 12126    |

### Family Specific Parameters:

|       | Estimate | Est.Error | l-95% CI | u-95% CI | Rhat | Bulk_ESS | Tail_ESS |
|-------|----------|-----------|----------|----------|------|----------|----------|
| sigma | 1.08     | 0.25      | 0.72     | 1.68     | 1.00 | 10735    | 11193    |

|    | Estimate  | Est.Error | Q2.5      | Q97.5     |
|----|-----------|-----------|-----------|-----------|
| R2 | 0.4020413 | 0.1007473 | 0.1837086 | 0.5647358 |

### Hypothesis Tests for class b:

|   | Hypothesis                            | Estimate | Est.Error | CI.Lower | CI.Upper | Evid.Ratio | Post.Prob |
|---|---------------------------------------|----------|-----------|----------|----------|------------|-----------|
| 1 | (is_trained1) < 0                     | 0.33     | 0.60      | -0.62    | 1.33     | 0.40       | 0.28      |
| 2 | (is_trained1+is_trained1:classC2) < 0 | 0.45     | 0.77      | -0.81    | 1.71     | 0.37       | 0.27      |
| 3 | (is_trained1+is_trained1:classE1) < 0 | 0.41     | 0.99      | -1.18    | 2.03     | 0.50       | 0.33      |
| 4 | (is_trained1+is_trained1:classE2) < 0 | 0.48     | 0.98      | -1.10    | 2.08     | 0.42       | 0.30      |
| 5 | (is_trained1:classC2) < 0             | 0.12     | 0.76      | -1.10    | 1.37     | 0.78       | 0.44      |

## 1.4.9 TMT\_delta model without class interaction

Family: gaussian  
 Links: mu = identity; sigma = identity  
 Formula: TMT\_delta\_post ~ TMT\_delta\_pre + n\_pretests + is\_trained + age + DASH  
 Data: fingers\_tap\_data (Number of observations: 19)  
 Samples: 4 chains, each with iter = 10000; warmup = 5000; thin = 1;  
 total post-warmup samples = 20000

### Population-Level Effects:

|               | Estimate | Est.Error | l-95% CI | u-95% CI | Rhat | Bulk_ESS | Tail_ESS |
|---------------|----------|-----------|----------|----------|------|----------|----------|
| Intercept     | -0.35    | 0.38      | -1.09    | 0.41     | 1.00 | 17732    | 12765    |
| TMT_delta_pre | 0.33     | 0.26      | -0.19    | 0.83     | 1.00 | 15967    | 12529    |
| n_pretests1   | -0.15    | 0.51      | -1.17    | 0.86     | 1.00 | 17224    | 14476    |
| is_trained1   | 0.51     | 0.49      | -0.48    | 1.47     | 1.00 | 15773    | 13247    |
| age           | 0.09     | 0.25      | -0.41    | 0.59     | 1.00 | 13930    | 12400    |
| DASH          | 0.33     | 0.26      | -0.18    | 0.83     | 1.00 | 14987    | 13025    |

### Family Specific Parameters:

|       | Estimate | Est.Error | l-95% CI | u-95% CI | Rhat | Bulk_ESS | Tail_ESS |
|-------|----------|-----------|----------|----------|------|----------|----------|
| sigma | 1.03     | 0.22      | 0.71     | 1.56     | 1.00 | 10855    | 12431    |

|    | Estimate  | Est.Error | Q2.5       | Q97.5     |
|----|-----------|-----------|------------|-----------|
| R2 | 0.3263214 | 0.1108469 | 0.09961406 | 0.5172946 |

### Hypothesis Tests for class b:

|   | Hypothesis        | Estimate | Est.Error | CI.Lower | CI.Upper | Evid.Ratio | Post.Prob |
|---|-------------------|----------|-----------|----------|----------|------------|-----------|
| 1 | (is_trained1) < 0 | 0.51     | 0.49      | -0.30    | 1.32     | 0.17       | 0.15      |
| 2 | (age) > 0         | 0.09     | 0.25      | -0.32    | 0.50     | 1.74       | 0.63      |
| 3 | (DASH) < 0        | 0.33     | 0.26      | -0.10    | 0.75     | 0.11       | 0.10      |
| 4 | (n_pretests1) > 0 | -0.15    | 0.51      | -0.99    | 0.69     | 0.63       | 0.39      |

## 1.4.10

## TMT\_delta model with class interaction

Family: gaussian

Links: mu = identity; sigma = identity

Formula: TMT\_delta\_post ~ TMT\_delta\_pre + is\_trained \* class + age + DASH

Data: fingers\_tap\_data (Number of observations: 19)

Samples: 4 chains, each with iter = 10000; warmup = 5000; thin = 1;  
total post-warmup samples = 20000

Population-Level Effects:

|                     | Estimate | Est.Error | l-95% CI | u-95% CI | Rhat | Bulk_ESS | Tail_ESS |
|---------------------|----------|-----------|----------|----------|------|----------|----------|
| Intercept           | -0.37    | 0.47      | -1.29    | 0.55     | 1.00 | 18933    | 15082    |
| TMT_delta_pre       | 0.32     | 0.28      | -0.24    | 0.86     | 1.00 | 17299    | 13014    |
| is_trained1         | 0.22     | 0.60      | -0.93    | 1.44     | 1.00 | 15628    | 13764    |
| classC2             | -0.01    | 0.60      | -1.19    | 1.17     | 1.00 | 18168    | 13223    |
| classE1             | 0.13     | 0.88      | -1.62    | 1.95     | 1.00 | 15496    | 12270    |
| classE2             | 0.22     | 0.89      | -1.55    | 1.99     | 1.00 | 15125    | 12221    |
| age                 | 0.09     | 0.28      | -0.47    | 0.65     | 1.00 | 15454    | 12338    |
| DASH                | 0.36     | 0.28      | -0.19    | 0.91     | 1.00 | 16362    | 14086    |
| is_trained1:classC2 | 0.31     | 0.78      | -1.21    | 1.90     | 1.00 | 15742    | 13735    |
| is_trained1:classE1 | 0.13     | 0.88      | -1.62    | 1.90     | 1.00 | 15766    | 12929    |
| is_trained1:classE2 | 0.23     | 0.88      | -1.50    | 2.04     | 1.00 | 15335    | 12444    |

Family Specific Parameters:

|       | Estimate | Est.Error | l-95% CI | u-95% CI | Rhat | Bulk_ESS | Tail_ESS |
|-------|----------|-----------|----------|----------|------|----------|----------|
| sigma | 1.10     | 0.25      | 0.73     | 1.68     | 1.00 | 10994    | 12401    |

|    | Estimate  | Est.Error  | Q2.5      | Q97.5     |
|----|-----------|------------|-----------|-----------|
| R2 | 0.3689947 | 0.09858325 | 0.1586638 | 0.5329625 |

Hypothesis Tests for class b:

|   | Hypothesis                            | Estimate | Est.Error | CI.Lower | CI.Upper | Evid.Ratio | Post.Prob |
|---|---------------------------------------|----------|-----------|----------|----------|------------|-----------|
| 1 | (is_trained1) < 0                     | 0.22     | 0.60      | -0.73    | 1.21     | 0.55       | 0.35      |
| 2 | (is_trained1+is_trained1:classC2) < 0 | 0.53     | 0.78      | -0.76    | 1.81     | 0.32       | 0.24      |
| 3 | (is_trained1+is_trained1:classE1) < 0 | 0.35     | 1.00      | -1.25    | 2.00     | 0.55       | 0.35      |
| 4 | (is_trained1+is_trained1:classE2) < 0 | 0.45     | 0.98      | -1.12    | 2.02     | 0.45       | 0.31      |
| 5 | (is_trained1:classC2) < 0             | 0.31     | 0.78      | -0.94    | 1.61     | 0.52       | 0.34      |

## 1.4.11

## Polhemus model without class interaction

Family: beta

Links: mu = logit; phi = identity

Formula: Polhemus\_post ~ Polhemus\_pre + n\_pretests + is\_trained + age + DASH

Data: fingers\_tap\_data (Number of observations: 20)

Samples: 4 chains, each with iter = 10000; warmup = 5000; thin = 1;  
total post-warmup samples = 20000

Population-Level Effects:

|              | Estimate | Est.Error | l-95% CI | u-95% CI | Rhat | Bulk_ESS | Tail_ESS |
|--------------|----------|-----------|----------|----------|------|----------|----------|
| Intercept    | -3.52    | 0.57      | -4.60    | -2.40    | 1.00 | 5674     | 9947     |
| Polhemus_pre | 6.20     | 3.48      | -0.24    | 11.79    | 1.00 | 5746     | 15528    |
| n_pretests1  | 0.49     | 0.47      | -0.47    | 1.40     | 1.00 | 10178    | 11595    |
| is_trained1  | -0.15    | 0.44      | -1.02    | 0.69     | 1.00 | 11124    | 11080    |
| age          | 0.02     | 0.25      | -0.49    | 0.50     | 1.00 | 12052    | 12455    |
| DASH         | 0.07     | 0.21      | -0.38    | 0.45     | 1.00 | 11176    | 11324    |

Family Specific Parameters:

|     | Estimate | Est.Error | l-95% CI | u-95% CI | Rhat | Bulk_ESS | Tail_ESS |
|-----|----------|-----------|----------|----------|------|----------|----------|
| phi | 22.23    | 10.84     | 6.71     | 47.62    | 1.00 | 5451     | 9418     |

|    | Estimate  | Est.Error | Q2.5       | Q97.5    |
|----|-----------|-----------|------------|----------|
| R2 | 0.4761384 | 0.2795128 | 0.02983493 | 0.830898 |

Hypothesis Tests for class b:

|   | Hypothesis        | Estimate | Est.Error | CI.Lower | CI.Upper | Evid.Ratio | Post.Prob |
|---|-------------------|----------|-----------|----------|----------|------------|-----------|
| 1 | (is_trained1) < 0 | -0.15    | 0.44      | -0.88    | 0.56     | 1.77       | 0.64      |
| 2 | (age) > 0         | 0.02     | 0.25      | -0.40    | 0.42     | 1.15       | 0.53      |
| 3 | (DASH) < 0        | 0.07     | 0.21      | -0.30    | 0.39     | 0.53       | 0.35      |
| 4 | (n_pretests1) > 0 | 0.49     | 0.47      | -0.30    | 1.25     | 6.11       | 0.86      |

### 1.4.12

### Polhemus model with class interaction

Family: beta  
 Links: mu = logit; phi = identity  
 Formula: Polhemus\_post ~ Polhemus\_pre + is\_trained \* class + age + DASH  
 Data: fingers\_tap\_data (Number of observations: 20)  
 Samples: 4 chains, each with iter = 10000; warmup = 5000; thin = 1;  
 total post-warmup samples = 20000

Population-Level Effects:

|                     | Estimate | Est.Error | l-95% CI | u-95% CI | Rhat | Bulk_ESS | Tail_ESS |
|---------------------|----------|-----------|----------|----------|------|----------|----------|
| Intercept           | -3.42    | 0.77      | -4.91    | -2.02    | 1.00 | 6911     | 12748    |
| Polhemus_pre        | 6.08     | 3.82      | -0.38    | 12.80    | 1.00 | 6585     | 13750    |
| is_trained1         | 0.11     | 0.57      | -1.07    | 1.22     | 1.00 | 11176    | 12252    |
| classC2             | -0.25    | 0.58      | -1.41    | 0.88     | 1.00 | 11136    | 12564    |
| classE1             | -0.54    | 0.95      | -2.55    | 1.26     | 1.00 | 15009    | 10692    |
| classE2             | -0.06    | 0.86      | -1.76    | 1.67     | 1.00 | 14734    | 10818    |
| age                 | 0.02     | 0.24      | -0.45    | 0.50     | 1.00 | 15604    | 12378    |
| DASH                | 0.11     | 0.22      | -0.34    | 0.52     | 1.00 | 13529    | 12234    |
| is_trained1:classC2 | 0.32     | 0.68      | -1.01    | 1.69     | 1.00 | 14482    | 13684    |
| is_trained1:classE1 | -0.54    | 0.95      | -2.56    | 1.25     | 1.00 | 14887    | 10961    |
| is_trained1:classE2 | -0.07    | 0.85      | -1.78    | 1.57     | 1.00 | 14226    | 10731    |

Family Specific Parameters:

|     | Estimate | Est.Error | l-95% CI | u-95% CI | Rhat | Bulk_ESS | Tail_ESS |
|-----|----------|-----------|----------|----------|------|----------|----------|
| phi | 24.99    | 12.68     | 7.61     | 55.19    | 1.00 | 7353     | 11700    |

|    | Estimate  | Est.Error | Q2.5       | Q97.5     |
|----|-----------|-----------|------------|-----------|
| R2 | 0.5096121 | 0.264892  | 0.06602196 | 0.8568316 |

Hypothesis Tests for class b:

|   | Hypothesis                            | Estimate | Est.Error | CI.Lower | CI.Upper | Evid.Ratio | Post.Prob |
|---|---------------------------------------|----------|-----------|----------|----------|------------|-----------|
| 1 | (is_trained1) < 0                     | 0.11     | 0.57      | -0.84    | 1.04     | 0.71       | 0.42      |
| 2 | (is_trained1+is_trained1:classC2) < 0 | 0.43     | 0.61      | -0.62    | 1.38     | 0.30       | 0.23      |
| 3 | (is_trained1+is_trained1:classE1) < 0 | -0.43    | 1.04      | -2.18    | 1.20     | 1.95       | 0.66      |
| 4 | (is_trained1+is_trained1:classE2) < 0 | 0.05     | 0.97      | -1.54    | 1.61     | 0.90       | 0.47      |
| 5 | (is_trained1:classC2) < 0             | 0.32     | 0.68      | -0.77    | 1.45     | 0.46       | 0.32      |

### 1.4.13

### Polhemus\_del model without class interaction

Family: beta  
 Links: mu = logit; phi = identity  
 Formula: Polhemus\_del\_post ~ Polhemus\_del\_pre + n\_pretests + is\_trained + age + DASH + (1 | participant)  
 Data: fingers\_tap\_data (Number of observations: 20)  
 Samples: 4 chains, each with iter = 10000; warmup = 5000; thin = 1;  
 total post-warmup samples = 20000

Group-Level Effects:

~participant (Number of levels: 14)

|               | Estimate | Est.Error | l-95% CI | u-95% CI | Rhat | Bulk_ESS | Tail_ESS |
|---------------|----------|-----------|----------|----------|------|----------|----------|
| sd(Intercept) | 0.87     | 0.37      | 0.13     | 1.66     | 1.00 | 2620     | 3268     |

Population-Level Effects:

|                  | Estimate | Est.Error | l-95% CI | u-95% CI | Rhat | Bulk_ESS | Tail_ESS |
|------------------|----------|-----------|----------|----------|------|----------|----------|
| Intercept        | -3.35    | 0.49      | -4.34    | -2.43    | 1.00 | 7087     | 10827    |
| Polhemus_del_pre | 2.36     | 2.21      | -0.82    | 7.50     | 1.00 | 9716     | 10054    |
| n_pretests1      | 0.45     | 0.52      | -0.54    | 1.50     | 1.00 | 7590     | 10905    |
| is_trained1      | 0.28     | 0.51      | -0.70    | 1.30     | 1.00 | 9187     | 12478    |
| age              | -0.17    | 0.34      | -0.86    | 0.48     | 1.00 | 7983     | 9735     |
| DASH             | -0.08    | 0.21      | -0.51    | 0.34     | 1.00 | 8462     | 11891    |

Family Specific Parameters:

|     | Estimate | Est.Error | l-95% CI | u-95% CI | Rhat | Bulk_ESS | Tail_ESS |
|-----|----------|-----------|----------|----------|------|----------|----------|
| phi | 63.14    | 39.84     | 12.97    | 161.50   | 1.00 | 2837     | 6229     |

|    | Estimate  | Est.Error | Q2.5       | Q97.5     |
|----|-----------|-----------|------------|-----------|
| R2 | 0.6933929 | 0.2433799 | 0.09076583 | 0.9447643 |

Hypothesis Tests for class b:

|   | Hypothesis        | Estimate | Est.Error | CI.Lower | CI.Upper | Evid.Ratio | Post.Prob |
|---|-------------------|----------|-----------|----------|----------|------------|-----------|
| 1 | (is_trained1) < 0 | 0.28     | 0.51      | -0.53    | 1.12     | 0.41       | 0.29      |



```

2      (age) > 0      -0.17      0.34      -0.74      0.37      0.43      0.30
3      (DASH) < 0     -0.08      0.21      -0.43      0.27      1.89      0.65
4 (n_pretests1) > 0  0.45      0.52      -0.38      1.31      4.41      0.82

```

### 1.4.14 Polhemus\_del model without class interaction

Family: beta

Links: mu = logit; phi = identity

Formula: Polhemus\_del\_post ~ Polhemus\_del\_pre + is\_trained \* class + age + DASH

Data: fingers\_tap\_data (Number of observations: 20)

Samples: 4 chains, each with iter = 10000; warmup = 5000; thin = 1;  
total post-warmup samples = 20000

Population-Level Effects:

|                      | Estimate | Est.Error | l-95% CI | u-95% CI | Rhat | Bulk_ESS | Tail_ESS |
|----------------------|----------|-----------|----------|----------|------|----------|----------|
| Intercept            | -3.53    | 0.72      | -5.04    | -2.30    | 1.00 | 6508     | 10376    |
| Polhemus_del_pre     | 4.57     | 3.37      | -0.55    | 11.03    | 1.00 | 6844     | 10947    |
| is_trained1          | 0.14     | 0.55      | -0.94    | 1.25     | 1.00 | 9960     | 11862    |
| classC2              | 0.41     | 0.59      | -0.72    | 1.61     | 1.00 | 8292     | 10883    |
| classE1              | 0.09     | 0.88      | -1.65    | 1.85     | 1.00 | 13388    | 11457    |
| classE2              | 0.24     | 0.87      | -1.46    | 2.00     | 1.00 | 13110    | 10970    |
| age                  | -0.19    | 0.24      | -0.65    | 0.28     | 1.00 | 11807    | 12860    |
| DASH                 | 0.13     | 0.20      | -0.29    | 0.49     | 1.00 | 13000    | 11613    |
| is_trained1: classC2 | 0.58     | 0.66      | -0.68    | 1.91     | 1.00 | 11853    | 12556    |
| is_trained1: classE1 | 0.09     | 0.88      | -1.65    | 1.84     | 1.00 | 14078    | 11213    |
| is_trained1: classE2 | 0.24     | 0.86      | -1.46    | 2.00     | 1.00 | 13447    | 11022    |

Family Specific Parameters:

|     | Estimate | Est.Error | l-95% CI | u-95% CI | Rhat | Bulk_ESS | Tail_ESS |
|-----|----------|-----------|----------|----------|------|----------|----------|
| phi | 26.31    | 13.79     | 8.62     | 60.82    | 1.00 | 7322     | 13050    |

|    | Estimate  | Est.Error | Q2.5      | Q97.5     |
|----|-----------|-----------|-----------|-----------|
| R2 | 0.3599727 | 0.2293004 | 0.0527204 | 0.8123338 |

Hypothesis Tests for class b:

|   | Hypothesis                             | Estimate | Est.Error | CI.Lower | CI.Upper | Evid.Ratio | Post.Prob |
|---|----------------------------------------|----------|-----------|----------|----------|------------|-----------|
| 1 | (is_trained1) < 0                      | 0.14     | 0.55      | -0.77    | 1.06     | 0.64       | 0.39      |
| 2 | (is_trained1+is_trained1: classC2) < 0 | 0.72     | 0.57      | -0.24    | 1.61     | 0.11       | 0.10      |
| 3 | (is_trained1+is_trained1: classE1) < 0 | 0.24     | 0.99      | -1.36    | 1.84     | 0.66       | 0.40      |
| 4 | (is_trained1+is_trained1: classE2) < 0 | 0.39     | 0.97      | -1.19    | 1.98     | 0.51       | 0.34      |
| 5 | (is_trained1: classC2) < 0             | 0.58     | 0.66      | -0.48    | 1.69     | 0.23       | 0.19      |

### 1.5 Model predictions for class x training interactions

The model's predictions for the training by class interaction are illustrated in Figures 3–5.

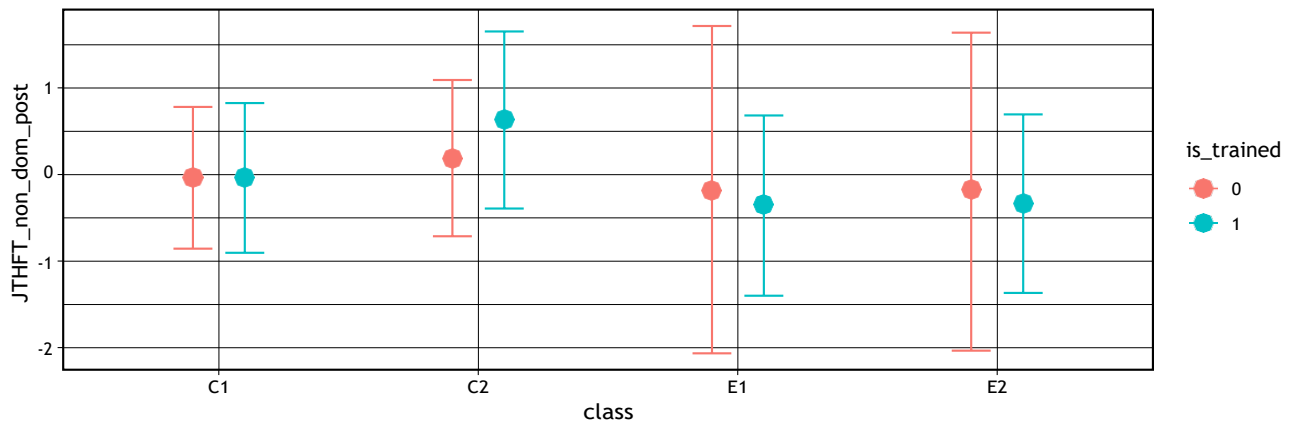

Figure 3. Fitted results (standardized) for JTHFT (non-dominant hand) post-test, grouped by class and training. A lower score is better. Due to the experimental design, there were no post-tests for

untrained participants in classes E1 and E2 – their fits shown in this figure are the model’s best estimates given the remaining data.

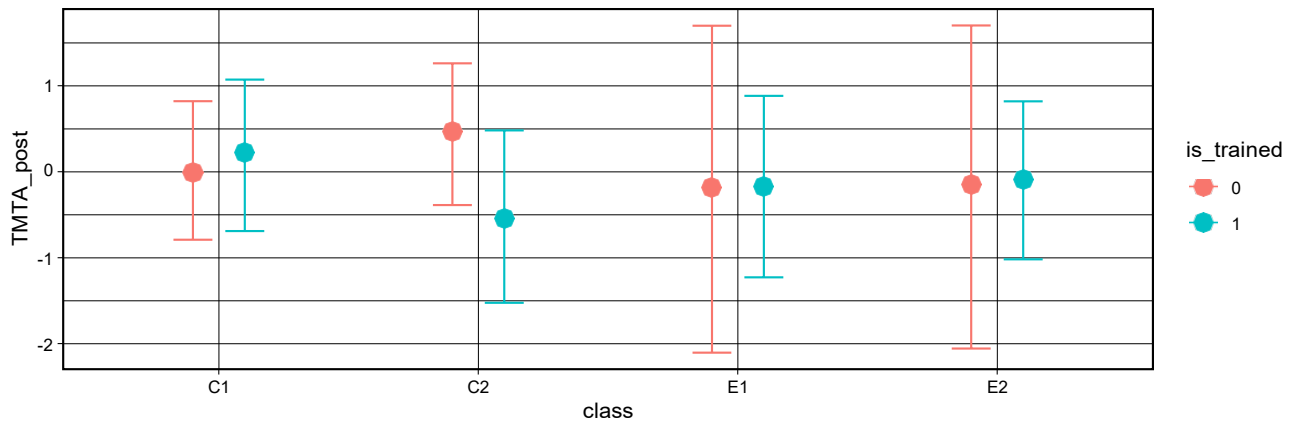

Figure 4. Fitted results (standardized) for the TMTA post-test, grouped by class and training. A lower score is better. Due to the experimental design, there were no post-tests for untrained participants in classes E1 and E2 – their fits shown in this figure are the model’s best estimates given the remaining data..

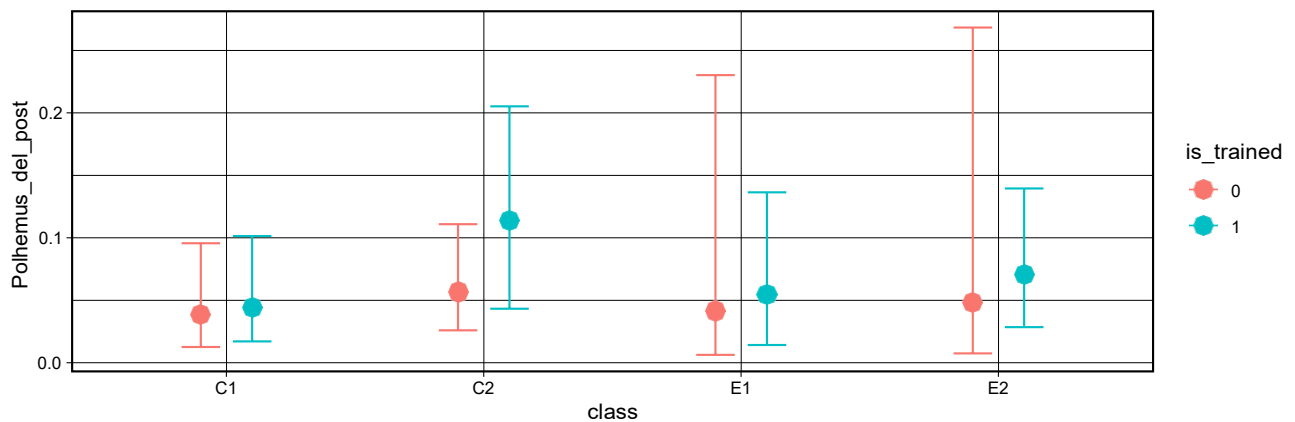

Figure 5. Fitted results (standardized) for the delayed Polhemus post-test, grouped by class and training. A lower score is better. Due to the experimental design, there were no post-tests for untrained participants in classes E1 and E2 – their fits shown in this figure are the model’s best estimates given the remaining data.
